# Supplementary material for: Sorption based easy-to-use low-cost filters derived from invasive weed biomass for dye contaminated water cleanup
Source: Royal Society of Chemistry journal article supplement (doi:10.1039/d2ra00670g), 2022-01-01
Supplement: d2ra00670g1.pdf [file d2ra00670g1.pdf]

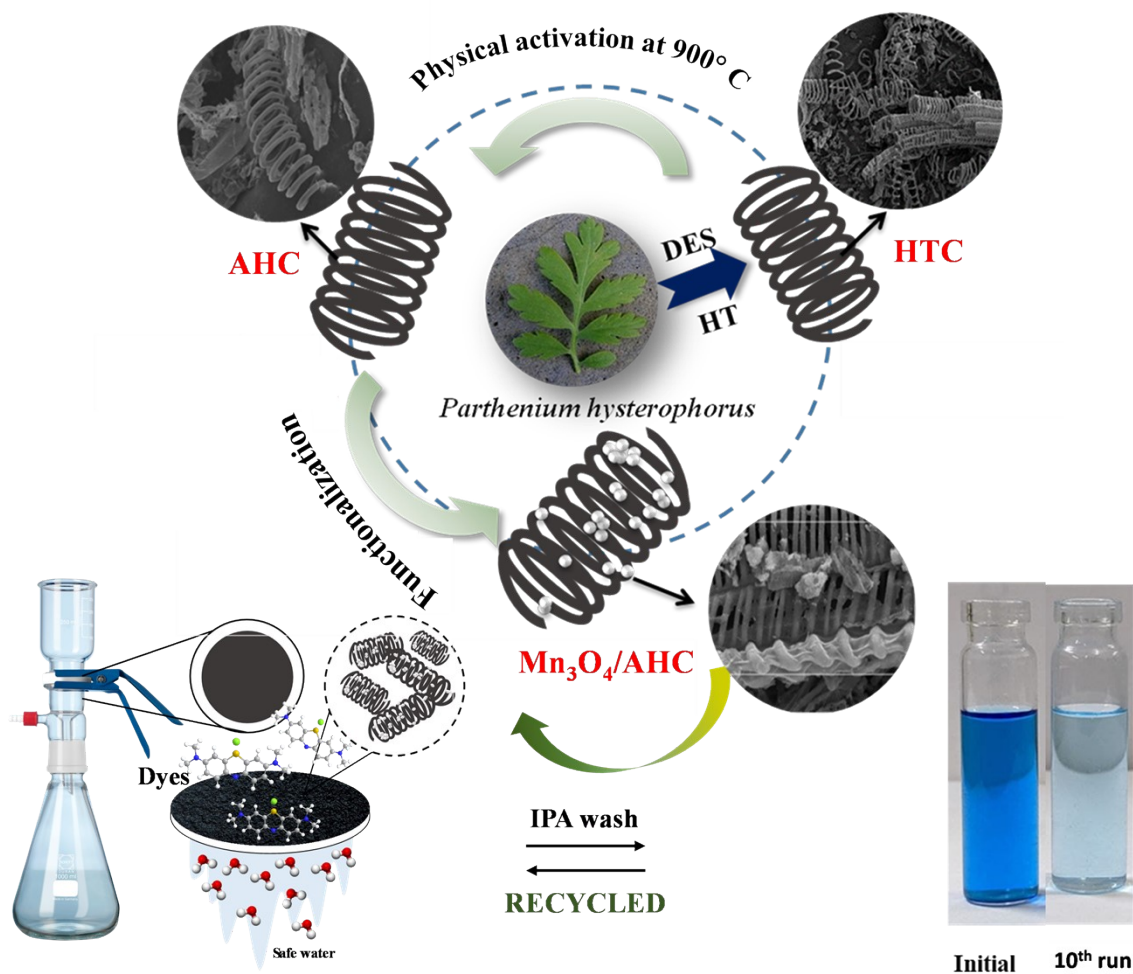

**Fig. S1.** Schematics for the synthesis of  $Mn_3O_4/AHC$  material and its application in adsorptive removal of dyes.

**Table S1.** Isotherm model parameters for the adsorption of MB dye onto AHC and  $Mn_3O_4/AHC$ .

| Adsorbent     | Langmuir Isotherm |              |       | Freundlich Isotherm |              |       |
|---------------|-------------------|--------------|-------|---------------------|--------------|-------|
|               | $q_m$ (mg/g)      | $K_l$ (L/mg) | $R^2$ | $1/n$               | $K_f$ (L/mg) | $R^2$ |
| AHC           | 26.23             | 36.33        | 0.97  | 8.58                | 12.74        | 0.7   |
| $Mn_3O_4/AHC$ | 113.37            | 3357.37      | 0.99  | 6.423               | 53.74        | 0.97  |

**Table S2.** Kinetic parameters for the adsorption of MB dye onto AHC and Mn<sub>3</sub>O<sub>4</sub>/AHC.

| Adsorbent                           | Pseudo-first order    |                                     |                | Pseudo-second order   |                                     |                |
|-------------------------------------|-----------------------|-------------------------------------|----------------|-----------------------|-------------------------------------|----------------|
|                                     | q <sub>e</sub> (mg/g) | k <sub>1</sub> (min <sup>-1</sup> ) | R <sup>2</sup> | q <sub>e</sub> (mg/g) | k <sub>2</sub> (min <sup>-1</sup> ) | R <sup>2</sup> |
| AHC                                 | 1790.23               | -0.00081                            | 0.54162        | 8.37                  | 12.4 x 10 <sup>-3</sup>             | 0.99           |
| Mn <sub>3</sub> O <sub>4</sub> /AHC | 3.27                  | -0.00011                            | 0.87566        | 7.25                  | 8.823 x 10 <sup>-3</sup>            | 0.98           |

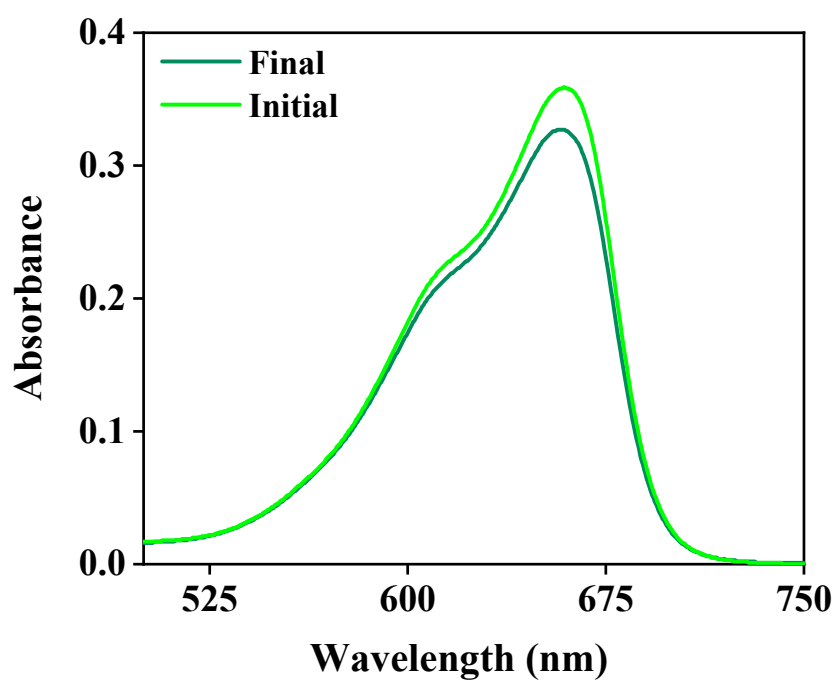

**Fig S2.** Methylene blue removal studies using bare Whatmann filter paper.

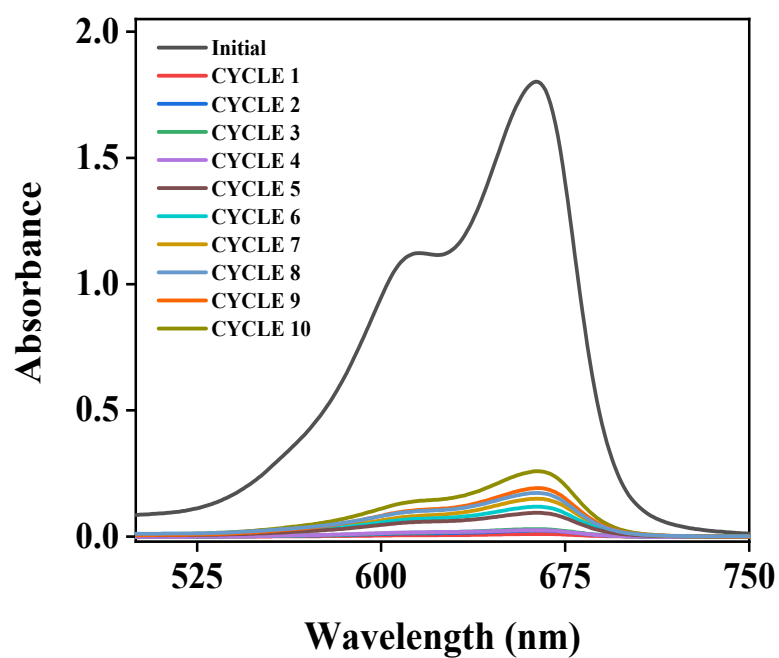

**Fig S3.** UV spectrum of recyclability study of  $Mn_3O_4/AHC$  based membrane for MB removal.

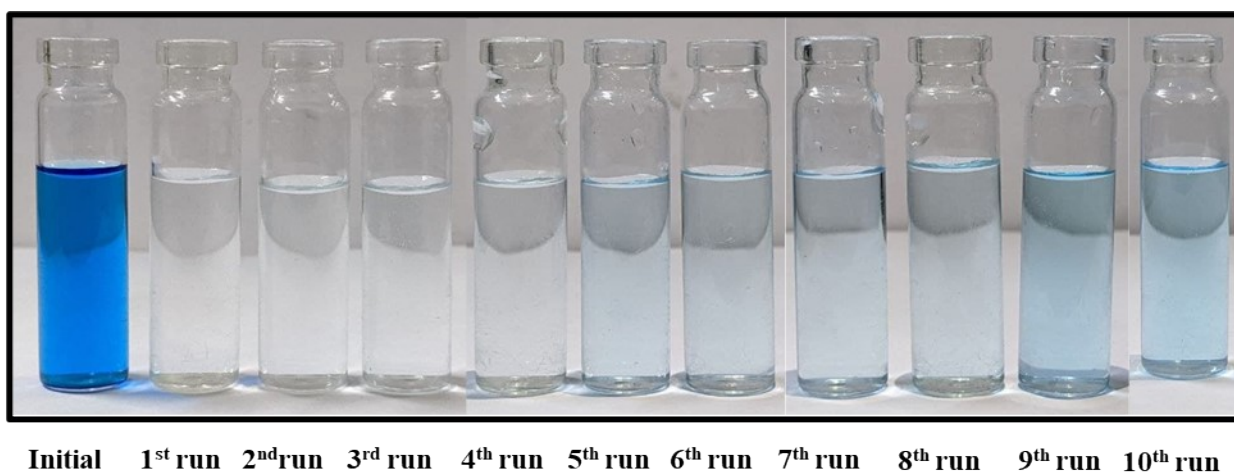

**Fig S4.** Digital photograph of permeates obtained during the recyclability study.
